# Supplementary material for: Domains of Electronic Medical Records Quality in Global Health: Stakeholder Perspectives Using the STEEEP Framework
Source: Research Square preprint supplement (doi:10.21203/rs.3.rs-6827804/v1), 2025-06-18
Supplement: Supplementary file 1 [file 2fd0b160587bfb203f972443.docx]

**Appendix A. Questionnaire guide.**

|  | **Main question** | **Follow-up questions and probes** |
| --- | --- | --- |
|  | **Research question**: How do people define quality EMRs based on their role? | General probes for all questions  - What do you mean by?  - Tell me more about...  - Give me an example of…  - Tell me about a time when…  - Tell me who/when/where…  - Walk me through.. |
| **Intro** | Intro to study script | |
|  | **Questions about Digital Health Interventions** | |
| **1** | In just a few sentences, briefly tell me about your background, experience in health care and with electronic medical records, and your current role. |  |
| **2** | What do you think about when deciding to select or invest in a digital health product? |  |
| **3** | How do you define "good quality" for a digital health tool? |  |
|  | **Questions about EMRs** | |
| **4** | Now let's talk about Electronic Medical Records or EMRs. When you think about the quality of EMRs, what five words or ideas come to mind? |  |
| **5** | Tell me more about each of the 5 words or ideas. For example, what do you mean by {insert one word or idea from interviewee}? | - What do you mean by?  - Tell me more about...  - Give me an example of… |
| **6** | How do EMRs fall short of quality? | When you think about low quality EMRs, what examples come to mind? |
| **7** | What do you see as your responsibility in the quality of an EMR? | As another way to think about this, in your role, how would you assure the quality of an EMR? |
| **8** | If you were going to recommend an EMR, how would you determine if it was high quality and worthy of recommendation? | Does communicating the quality of EMRs change based on the role of the person you are recommending to? What kind of activities might be conducted to assess quality? |
| **9** | Finish this sentence when someone is telling you about an EMR they are recommending... "This EMR is good quality because _______" | In other words, What do you need to know here to feel you can trust the quality of an EMR? |
| **10** | What do you suppose others' consider when assessing whether they can trust the quality of an EMR, particularly those who hold roles different than you? | Who are the others and their roles that you are referring to in this question |
| **11** | Is there anything that we have not covered that you would like to share about your experiences with the quality of EMRs or trusting an EMR? |  |
|  | **Demographic questions & experience** | |
| **12** | Now I have just a few demographic questions... | Please indicate your country of origin and the country you are based in now |
| **13** | What is your current organization, your job title or role, and how long have you been in this role? |
| **14** | Do you have anyone that you would recommend we connect with for this study? Would you introduce us? |  |
